# Supplementary material
Source: publisher figshare collection journal article supplement (https://acs.figshare.com/ndownloader/files/4053844)
Supplement: Supplementary file 1 [file 4053844]

data_ban1147


# 1. SUBMISSION DETAILS                                                       
_publ_requested_journal          J.Org.Chem.
_publ_contact_author_name        'Martin G. Banwell'

_publ_contact_author_address     
;
Research School of Chemistry,
Australian National University,
Canberra, A. C. T. 0200, Australia
;
_publ_contact_author_email       'mgb@rsc.anu.edu.au '
_publ_contact_author_phone       ' 61 2 6125 8202 '
_publ_contact_author_fax         ' 61 2 6125 8114 '
loop_
_publ_author_name
_publ_author_address
'Kim, Hye Sun'
;
Research School of Chemistry,
The Australian National University,
Canberra, A. C. T. 0200, Australia
;
'Banwell, Martin G.'
;
Research School of Chemistry,
The Australian National University,
Canberra, A. C. T. 0200, Australia
;
'Willis, Anthony C.'
;
Research School of Chemistry,
The Australian National University,
Canberra, A. C. T. 0200, Australia
;
_audit_creation_date             12-01-13
_audit_creation_method           CRYSTALS_ver_14.11
_audit_update_record             
;
2012-01-13 - Report on C18 H26 N2 O3 Si 
             by Anthony C. Willis
             for  Hye Sun Kim and Martin Banwell

2012-01-13 - passes checkcif tests with few warnings  
;

_oxford_structure_analysis_title '12161240 ban1147'
_chemical_name_systematic        ?
_chemical_melting_point          ?

_cell_length_a                   21.9693(7)
_cell_length_b                   9.6562(3)
_cell_length_c                   16.0510(5)
_cell_angle_alpha                90
_cell_angle_beta                 126.4796(15)
_cell_angle_gamma                90
_cell_volume                     2737.90(16)

_symmetry_cell_setting           monoclinic
_symmetry_space_group_name_H-M   'C 1 2/c 1 '
_symmetry_space_group_name_Hall  ?
loop_
_symmetry_equiv_pos_as_xyz
x,y,z
-x,-y,-z
x+1/2,y+1/2,z
-x+1/2,-y+1/2,-z
-x,y,-z+1/2
x,-y,z+1/2
-x+1/2,y+1/2,-z+1/2
x+1/2,-y+1/2,z+1/2

loop_
_atom_type_symbol
_atom_type_scat_dispersion_real
_atom_type_scat_dispersion_imag
_atom_type_scat_Cromer_Mann_a1
_atom_type_scat_Cromer_Mann_b1
_atom_type_scat_Cromer_Mann_a2
_atom_type_scat_Cromer_Mann_b2
_atom_type_scat_Cromer_Mann_a3
_atom_type_scat_Cromer_Mann_b3
_atom_type_scat_Cromer_Mann_a4
_atom_type_scat_Cromer_Mann_b4
_atom_type_scat_Cromer_Mann_c
_atom_type_scat_source
C 0.0033 0.0016 2.3100 20.8439 1.0200 10.2075 1.5886 0.5687 0.8650 51.6512
0.2156 'International Tables Vol C 4.2.6.8 and 6.1.1.4'
H 0.0000 0.0000 0.4930 10.5109 0.3229 26.1257 0.1402 3.1424 0.0408 57.7998
0.0030 'International Tables Vol C 4.2.6.8 and 6.1.1.4'
Br -0.2901 2.4595 17.1789 2.1723 5.2358 16.5796 5.6377 0.2609 3.9851 41.4328
2.9557 'International Tables Vol C 4.2.6.8 and 6.1.1.4'
N 0.0061 0.0033 12.2126 0.0057 3.1322 9.8933 2.0125 28.9975 1.1663 0.5826
-11.5290 'International Tables Vol C 4.2.6.8 and 6.1.1.4'
O 0.0106 0.0060 3.0485 13.2771 2.2868 5.7011 1.5463 0.3239 0.8670 32.9089
0.2508 'International Tables Vol C 4.2.6.8 and 6.1.1.4'


_cell_formula_units_Z            4

# Given Formula = C30 H18 Br2 N2 O8 
# Dc =      1.68 Fooo =   1384.00 Mu =     30.18 M =    347.14
# Found Formula = C30 H18 Br2 N2 O8 
# Dc =      1.68 FOOO =   1384.00 Mu =     30.18 M =    347.14

_chemical_formula_sum            'C30 H18 Br2 N2 O8'
_chemical_formula_moiety         'C30 H18 Br2 N2 O8'
_chemical_compound_source        local
_chemical_formula_weight         694.29


_cell_measurement_reflns_used    12429
_cell_measurement_theta_min      3
_cell_measurement_theta_max      27.5
_cell_measurement_temperature    295

_exptl_crystal_description       needle
_exptl_crystal_colour            colourless
_exptl_crystal_size_min          0.060
_exptl_crystal_size_mid          0.100
_exptl_crystal_size_max          0.410

_exptl_crystal_density_diffrn    1.684
_exptl_crystal_density_meas      ?
_exptl_crystal_density_method    'not measured'
# Non-dispersive F(000): 
_exptl_crystal_F_000             1384
_exptl_absorpt_coefficient_mu    3.018

# Sheldrick geometric approximatio 0.74 0.83 
_exptl_absorpt_correction_type   multi-scan
_exptl_absorpt_process_details   'DENZO/SCALEPACK (Otwinowski & Minor, 1997)'
_exptl_absorpt_correction_T_min  0.70 # 0.83*8.39/10.0=0.70 #0.74 
_exptl_absorpt_correction_T_max  0.83
# For a Kappa CCD, set Tmin to 1.0 and 
# Tmax to the ratio of max:min frame scales in scale_all.log 
_diffrn_measurement_device_type  'Nonius KappaCCD'
_diffrn_measurement_device       Area
_diffrn_radiation_monochromator  graphite
_diffrn_radiation_type           'Mo K\a'
_diffrn_radiation_wavelength     0.71073
_diffrn_measurement_method       ' \f and \w scans with CCD '
_diffrn_special_details          
; 
CCD data collecting conditions- 
phi and omega scans of width 2.0 deg at rate 200 sec/frame,
crystal-detector distance 428mm, 
multiple scan sets so over 90 percent of data collected with 4-fold   
redundancy or more. 
;

# If a reference occurs more than once, delete the author 
# and date from subsequent references. 
_computing_data_collection       'COLLECT (Nonius, 2001).'
_computing_cell_refinement       'DENZO/SCALEPACK (Otwinowski & Minor, 1997)'
_computing_data_reduction        'DENZO/SCALEPACK (Otwinowski & Minor, 1997)'
_computing_structure_solution    'SIR92 (Altomare et al., 1994)'
_computing_structure_refinement  'CRYSTALS (Betteridge et al., 2003)'
_computing_publication_material  'CRYSTALS (Betteridge et al., 2003)'
_computing_molecular_graphics    
;  
ORTEP-II (Johnson 1976) in teXsan (MSC, 1992-1997) 
;

_diffrn_standards_interval_time  .
_diffrn_standards_interval_count .
_diffrn_standards_number         0
_diffrn_standards_decay_%        ?

_diffrn_ambient_temperature      295 # YES! It's room temp
_diffrn_reflns_number            27544
_reflns_number_total             3150
_diffrn_reflns_av_R_equivalents  0.053 # scalepack 
# Number of reflections without Friedels Law is 0 
# Number of reflections with Friedels Law is 3150 
# Theoretical number of reflections is about 6293 


_diffrn_reflns_theta_min         2.574
_diffrn_reflns_theta_max         27.505
_diffrn_measured_fraction_theta_max 0.998

_diffrn_reflns_theta_full        27.505
_diffrn_measured_fraction_theta_full 0.998


_diffrn_reflns_limit_h_min       -28
_diffrn_reflns_limit_h_max       28
_diffrn_reflns_limit_k_min       -12
_diffrn_reflns_limit_k_max       12
_diffrn_reflns_limit_l_min       -20
_diffrn_reflns_limit_l_max       16
_reflns_limit_h_min              -28
_reflns_limit_h_max              22
_reflns_limit_k_min              0
_reflns_limit_k_max              12
_reflns_limit_l_min              0
_reflns_limit_l_max              20

_oxford_diffrn_Wilson_B_factor   4.77
_oxford_diffrn_Wilson_scale      37.68

_atom_sites_solution_primary     direct #heavy,direct,difmap,geom
# _atom_sites_solution_secondary  difmap
_atom_sites_solution_hydrogens   geom

_refine_diff_density_min         -0.91
_refine_diff_density_max         0.62


# The current dictionary definitions do not cover the 
# situation where the reflections used for refinement were 
# selected by a user-defined sigma threshold 


# The values actually used during refinement 
_oxford_reflns_threshold_expression_ref I>-10.0\s(I)
_refine_ls_number_reflns         3150
_refine_ls_number_restraints     0
_refine_ls_number_parameters     190
_oxford_refine_ls_R_factor_ref   0.0774
_refine_ls_wR_factor_ref         0.1116
_refine_ls_goodness_of_fit_ref   0.9448
_refine_ls_shift/su_max          0.0211483
_refine_ls_shift/su_mean         0.0057559


# The values computed from all data 
_oxford_reflns_number_all        3150
_refine_ls_R_factor_all          0.0774
_refine_ls_wR_factor_all         0.1116

# The values computed with a 2 sigma cutoff - a la SHELX 
_reflns_threshold_expression     I>2.0\s(I)
_reflns_number_gt                2011
_refine_ls_R_factor_gt           0.0415
_refine_ls_wR_factor_gt          0.0968

# choose from: rm (reference molecule of known chirality), 
# ad (anomolous dispersion - Flack), rmad (rm and ad), 
# syn (from synthesis), unk (unknown) or . (not applicable). 
_chemical_absolute_configuration .


_refine_ls_structure_factor_coef Fsqd
_refine_ls_matrix_type           full
_refine_ls_hydrogen_treatment    constr # none, undef, noref, refall,
# refxyz, refU, constr or mixed
_refine_ls_weighting_scheme      calc
_refine_ls_weighting_details     
;
 Method= Modified Sheldrick 
 w=1/[\s^2^(F^2^) + ( 0.05P)^2^ + 4.31P] 
 ,where P=(max(Fo^2^,0) + 2Fc^2^)/3 
;
_publ_requested_category         FO
_publ_contact_letter             
;
    ENTER TEXT OF LETTER
;

_publ_requested_coeditor_name    ?

#=============================================================================  
# 2. PROCESSING SUMMARY (IUCr Office Use Only)                                  
_journal_date_recd_electronic    ?
_journal_date_to_coeditor        ?
_journal_date_from_coeditor      ?
_journal_date_accepted           ?
_journal_date_printers_first     ?
_journal_date_printers_final     ?
_journal_date_proofs_out         ?
_journal_date_proofs_in          ?
_journal_coeditor_name           ?
_journal_coeditor_code           ?
_journal_coeditor_notes          
;                                                                               
                                  ?                                             
;
_journal_techeditor_code         ?
_journal_techeditor_notes        
;                                                                               
                                  ?                                             
;
_journal_coden_ASTM              ?
_journal_name_full               ?
_journal_year                    ?
_journal_volume                  ?
_journal_issue                   ?
_journal_page_first              ?
_journal_page_last               ?
_journal_suppl_publ_number       ?
_journal_suppl_publ_pages        ?
#=============================================================================  
# 3. TITLE AND AUTHOR LIST                                                      
_publ_section_title              
;                                                                               
Convergent Total Syntheses of the Amaryllidaceae Alkaloids 
Lycoranine A, Lycoranine B and 2-Methoxypratosine
;
#============================================================================== 
# 4. TEXT                                                                       
_publ_section_abstract           
#Text of the abstract                                   
;                                                                               
The crystal structure of 
C~30~H~18~Br~2~N~2~O~8~ is reported.
;
_publ_section_comment            
#Text of the paper                                       
;                                                                               
 
The crystallographic asymmetric unit consists of
one half of a molecule of 
C~30~H~18~Br~2~N~2~O~8~.
The other half of the molecule is generated by a crystallographic
two-fold symmetry operation. 
;
_publ_section_acknowledgements   
# Acknowledgments                               
;                                                                               
?                                                                               
;
_publ_section_figure_captions    
#Captions to figures                             
;                                                                               
?                                                                               
;
_publ_section_exptl_refinement   
# see also _refine_ls_hydrogen for refinement keywords.                         
;                                                                               
;
_publ_section_exptl_prep         
;                                                                               
 The compound was prepared by HSK 
and recrystallised from dichloromethane.
The sample ID is HS-B-045-5.
;

_refine_special_details          
;


H atoms 
were included at calculated positions.
They were initially refined with soft restraints on the 
bond lengths and angles to regularise their geometry 
(C---H in the range 0.93--0.98 \%A) and with
U~iso~(H) in the range 1.2-1.5 times U~eq~ of the parent atom, 
after which the positions were refined with riding constraints
and the displacement parameters were held fixed. 

The peaks in the final difference map are mainly located 
near the Br atom or
midway along bonds.

;

# Insert your own references if required - in alphabetical order 
_publ_section_references         

; 

Altomare, A., Cascarano, G., Giacovazzo, G., Guagliardi, A., Burla, M.C., 
Polidori, G. & Camalli, M. (1994). J. Appl. Cryst. 27, 435. 
 
Betteridge, P.W., Carruthers, J.R., Cooper, R.I., 
Prout, K. & Watkin, D.J. (2003). J. Appl. Cryst. 36, 1487. 
  

Nonius (1997-2001). COLLECT. Nonius BV, Delft, The Netherlands. 
 
Otwinowski, Z. & Minor, W. (1997). Methods in Enzymology, Vol. 276, 
edited by C. W. Carter Jr & R. M. Sweet, pp. 307--326. 
New York: Academic Press. 
 

Molecular Structure Corporation. (1992-1997). teXsan. 
Single Crystal Structure Analysis Software. Version 1.8.
MSC, 3200 Research Forest Drive, The Woodlands, TX 77381, USA.

Johnson, C.K. (1976)
ORTEP-II, A Fortran Thermal-Ellipsoid Plot Program, Report ORNL-5138, 
Oak Ridge National Laboratory, Oak Ridge, Tennessee, USA.
;


# Uequiv = arithmetic mean of Ui i.e. Ueqiv = (U1+U2+U3)/3

# Replace last . with number of unfound hydrogen atomsattached to an atom.

# ..._refinement_flags_... 
# . no refinement constraints           S special position constraint on site
# G rigid group refinement of site      R riding atom
# D distance or angle restraint on site T thermal displacement constraints
# U Uiso or Uij restraint (rigid bond)  P partial occupancy constraint


loop_
_atom_site_label
_atom_site_type_symbol
_atom_site_fract_x
_atom_site_fract_y
_atom_site_fract_z
_atom_site_U_iso_or_equiv
_atom_site_occupancy
_atom_site_adp_type
_atom_site_refinement_flags_posn
_atom_site_refinement_flags_adp
_atom_site_refinement_flags_occupancy
_atom_site_disorder_assembly
_atom_site_disorder_group
_atom_site_attached_hydrogens
Br1 Br 0.55405(2) 0.77939(4) 0.45976(3) 0.0755 1.0000 Uani . . . . . .
O1 O 0.71495(12) -0.1075(2) 0.43007(19) 0.0685 1.0000 Uani . . . . . .
O2 O 0.76166(12) 0.0666(3) 0.55358(18) 0.0673 1.0000 Uani . . . . . .
O3 O 0.44686(10) 0.3014(2) 0.32037(16) 0.0487 1.0000 Uani . . . . . .
O4 O 0.27377(13) 0.6547(3) 0.2833(2) 0.0736 1.0000 Uani . . . . . .
N1 N 0.54726(13) 0.4461(3) 0.39950(18) 0.0475 1.0000 Uani . . . . . .
C1 C 0.53969(15) 0.1004(3) 0.2987(2) 0.0437 1.0000 Uani . . . . . .
C2 C 0.58668(16) -0.0103(3) 0.3125(2) 0.0490 1.0000 Uani . . . . . .
C3 C 0.65981(16) -0.0109(3) 0.4007(2) 0.0498 1.0000 Uani . . . . . .
C4 C 0.7800(2) -0.0594(4) 0.5284(3) 0.0818 1.0000 Uani . . . . . .
C5 C 0.68739(15) 0.0915(3) 0.4734(2) 0.0500 1.0000 Uani . . . . . .
C6 C 0.64385(16) 0.2007(3) 0.4633(2) 0.0494 1.0000 Uani . . . . . .
C7 C 0.56774(15) 0.2034(3) 0.3743(2) 0.0440 1.0000 Uani . . . . . .
C8 C 0.52284(16) 0.3215(3) 0.3656(2) 0.0443 1.0000 Uani . . . . . .
C9 C 0.48362(16) 0.5176(3) 0.3765(2) 0.0464 1.0000 Uani . . . . . .
C10 C 0.47279(18) 0.6535(3) 0.3931(2) 0.0505 1.0000 Uani . . . . . .
C11 C 0.40132(19) 0.6941(3) 0.3601(3) 0.0569 1.0000 Uani . . . . . .
C12 C 0.34128(18) 0.5998(4) 0.3113(3) 0.0569 1.0000 Uani . . . . . .
C13 C 0.35000(17) 0.4638(3) 0.2941(2) 0.0537 1.0000 Uani . . . . . .
C14 C 0.42225(16) 0.4294(3) 0.3276(2) 0.0471 1.0000 Uani . . . . . .
C15 C 0.2091(2) 0.5659(5) 0.2282(3) 0.0801 1.0000 Uani . . . . . .
H21 H 0.5692 -0.0812 0.2630 0.0583 1.0000 Uiso R . . . . .
H41 H 0.8210 -0.0475 0.5236 0.0988 1.0000 Uiso R . . . . .
H42 H 0.7939 -0.1279 0.5810 0.0981 1.0000 Uiso R . . . . .
H61 H 0.6625 0.2704 0.5129 0.0586 1.0000 Uiso R . . . . .
H111 H 0.3929 0.7843 0.3709 0.0681 1.0000 Uiso R . . . . .
H131 H 0.3108 0.4021 0.2635 0.0634 1.0000 Uiso R . . . . .
H151 H 0.1659 0.6157 0.2130 0.1195 1.0000 Uiso R . . . . .
H152 H 0.1999 0.5377 0.1642 0.1194 1.0000 Uiso R . . . . .
H153 H 0.2172 0.4856 0.2692 0.1198 1.0000 Uiso R . . . . .

loop_
_atom_site_aniso_label
_atom_site_aniso_U_11
_atom_site_aniso_U_22
_atom_site_aniso_U_33
_atom_site_aniso_U_23
_atom_site_aniso_U_13
_atom_site_aniso_U_12
Br1 0.0728(3) 0.0529(2) 0.0911(3) -0.00352(19) 0.0435(2) -0.01141(17)
O1 0.0433(12) 0.0589(14) 0.0785(16) 0.0005(12) 0.0226(12) 0.0132(10)
O2 0.0378(11) 0.0647(15) 0.0657(14) 0.0028(12) 0.0125(11) 0.0063(10)
O3 0.0380(10) 0.0500(12) 0.0542(12) -0.0057(9) 0.0252(9) -0.0006(9)
O4 0.0563(14) 0.0690(16) 0.0955(18) -0.0039(14) 0.0451(14) 0.0130(12)
N1 0.0420(13) 0.0456(14) 0.0506(14) 0.0017(11) 0.0252(11) 0.0018(11)
C1 0.0375(14) 0.0436(15) 0.0471(16) 0.0026(13) 0.0236(13) -0.0003(12)
C2 0.0440(15) 0.0437(15) 0.0541(17) -0.0018(14) 0.0264(14) 0.0003(13)
C3 0.0388(15) 0.0450(16) 0.0626(18) 0.0065(14) 0.0285(15) 0.0061(13)
C4 0.0422(18) 0.062(2) 0.098(3) 0.001(2) 0.0176(19) 0.0089(16)
C5 0.0330(15) 0.0557(18) 0.0476(16) 0.0044(14) 0.0165(13) 0.0005(12)
C6 0.0402(15) 0.0506(17) 0.0452(16) -0.0019(13) 0.0187(13) -0.0016(13)
C7 0.0365(14) 0.0450(16) 0.0475(16) 0.0031(13) 0.0232(13) 0.0006(12)
C8 0.0397(14) 0.0507(16) 0.0399(15) 0.0010(13) 0.0223(13) 0.0010(12)
C9 0.0434(15) 0.0478(16) 0.0453(16) 0.0018(13) 0.0248(14) 0.0025(12)
C10 0.0562(18) 0.0433(16) 0.0522(17) 0.0039(14) 0.0322(16) -0.0003(14)
C11 0.063(2) 0.0469(18) 0.063(2) 0.0030(15) 0.0380(17) 0.0099(15)
C12 0.0520(18) 0.0590(19) 0.062(2) 0.0059(16) 0.0348(16) 0.0137(15)
C13 0.0446(16) 0.0563(19) 0.0586(18) -0.0025(15) 0.0298(15) 0.0027(14)
C14 0.0465(16) 0.0451(15) 0.0499(16) -0.0004(13) 0.0287(14) 0.0031(13)
C15 0.051(2) 0.086(3) 0.104(3) 0.005(2) 0.046(2) 0.0137(19)

_refine_ls_extinction_method     None
_oxford_refine_ls_scale          0.18028(13)
loop_
_geom_bond_atom_site_label_1
_geom_bond_site_symmetry_1
_geom_bond_atom_site_label_2
_geom_bond_site_symmetry_2
_geom_bond_distance
_geom_bond_publ_flag
Br1 . C10 . 1.881(3) yes
O1 . C3 . 1.371(3) yes
O1 . C4 . 1.438(4) yes
O2 . C4 . 1.414(5) yes
O2 . C5 . 1.371(3) yes
O3 . C8 . 1.382(3) yes
O3 . C14 . 1.381(3) yes
O4 . C12 . 1.375(4) yes
O4 . C15 . 1.429(5) yes
N1 . C8 . 1.298(4) yes
N1 . C9 . 1.398(4) yes
C1 . C1 5_655 1.497(5) yes
C1 . C2 . 1.409(4) yes
C1 . C7 . 1.398(4) yes
C2 . C3 . 1.371(4) yes
C2 . H21 . 0.941 no
C3 . C5 . 1.367(4) yes
C4 . H41 . 0.954 no
C4 . H42 . 0.968 no
C5 . C6 . 1.367(4) yes
C6 . C7 . 1.413(4) yes
C6 . H61 . 0.930 no
C7 . C8 . 1.460(4) yes
C9 . C10 . 1.388(4) yes
C9 . C14 . 1.379(4) yes
C10 . C11 . 1.382(4) yes
C11 . C12 . 1.398(5) yes
C11 . H111 . 0.927 no
C12 . C13 . 1.378(5) yes
C13 . C14 . 1.380(4) yes
C13 . H131 . 0.914 no
C15 . H151 . 0.958 no
C15 . H152 . 0.961 no
C15 . H153 . 0.963 no
loop_
_geom_angle_atom_site_label_1
_geom_angle_site_symmetry_1
_geom_angle_atom_site_label_2
_geom_angle_site_symmetry_2
_geom_angle_atom_site_label_3
_geom_angle_site_symmetry_3
_geom_angle
_geom_angle_publ_flag
C3 . O1 . C4 . 104.9(3) yes
C4 . O2 . C5 . 105.4(3) yes
C8 . O3 . C14 . 103.9(2) yes
C12 . O4 . C15 . 117.0(3) yes
C8 . N1 . C9 . 104.3(2) yes
C1 5_655 C1 . C2 . 117.0(2) yes
C1 5_655 C1 . C7 . 123.0(2) yes
C2 . C1 . C7 . 120.0(3) yes
C1 . C2 . C3 . 117.8(3) yes
C1 . C2 . H21 . 121.8 no
C3 . C2 . H21 . 120.4 no
O1 . C3 . C2 . 127.7(3) yes
O1 . C3 . C5 . 110.2(3) yes
C2 . C3 . C5 . 122.0(3) yes
O1 . C4 . O2 . 109.0(3) yes
O1 . C4 . H41 . 108.7 no
O2 . C4 . H41 . 111.3 no
O1 . C4 . H42 . 109.2 no
O2 . C4 . H42 . 109.5 no
H41 . C4 . H42 . 109.2 no
O2 . C5 . C3 . 110.5(3) yes
O2 . C5 . C6 . 127.2(3) yes
C3 . C5 . C6 . 122.2(3) yes
C5 . C6 . C7 . 117.3(3) yes
C5 . C6 . H61 . 122.3 no
C7 . C6 . H61 . 120.4 no
C6 . C7 . C1 . 120.7(3) yes
C6 . C7 . C8 . 115.9(3) yes
C1 . C7 . C8 . 123.3(2) yes
C7 . C8 . O3 . 118.5(2) yes
C7 . C8 . N1 . 126.7(3) yes
O3 . C8 . N1 . 114.8(2) yes
N1 . C9 . C10 . 132.5(3) yes
N1 . C9 . C14 . 109.3(3) yes
C10 . C9 . C14 . 118.2(3) yes
Br1 . C10 . C9 . 120.5(2) yes
Br1 . C10 . C11 . 120.8(2) yes
C9 . C10 . C11 . 118.7(3) yes
C10 . C11 . C12 . 120.6(3) yes
C10 . C11 . H111 . 120.1 no
C12 . C11 . H111 . 119.4 no
C11 . C12 . O4 . 114.0(3) yes
C11 . C12 . C13 . 122.4(3) yes
O4 . C12 . C13 . 123.6(3) yes
C12 . C13 . C14 . 114.6(3) yes
C12 . C13 . H131 . 121.9 no
C14 . C13 . H131 . 123.5 no
O3 . C14 . C13 . 126.9(3) yes
O3 . C14 . C9 . 107.5(2) yes
C13 . C14 . C9 . 125.6(3) yes
O4 . C15 . H151 . 109.1 no
O4 . C15 . H152 . 109.4 no
H151 . C15 . H152 . 108.8 no
O4 . C15 . H153 . 110.5 no
H151 . C15 . H153 . 109.3 no
H152 . C15 . H153 . 109.8 no
#------------------------------------------------------------------------------
loop_
_geom_contact_atom_site_label_1
_geom_contact_atom_site_label_2
_geom_contact_distance
_geom_contact_site_symmetry_1
_geom_contact_site_symmetry_2
_geom_contact_publ_flag
Br1 C2 3.499(4) . 1_565 no
O1 C4 3.273(4) . 4_646 no
O1 O1 3.298(4) . 4_646 no
O1 C15 3.581(6) . 3_545 no
O2 C13 3.138(4) . 8 no
O2 C6 3.178(5) . 4_656 no
O2 C5 3.594(4) . 4_656 no
N1 C4 3.423(5) . 4_656 no
N1 C11 3.580(5) . 2_666 no
C3 C15 3.599(7) . 3_545 no
C9 C9 3.600(7) . 2_666 no
#------------------------------------------------------------------------------
loop_
_geom_torsion_atom_site_label_1
_geom_torsion_atom_site_label_2
_geom_torsion_atom_site_label_3
_geom_torsion_atom_site_label_4
_geom_torsion_site_symmetry_1
_geom_torsion_site_symmetry_2
_geom_torsion_site_symmetry_3
_geom_torsion_site_symmetry_4
_geom_torsion
_geom_torsion_publ_flag
Br1 C10 C9 N1 . . . . -0.7(5) no
Br1 C10 C9 C14 . . . . 179.8(3) no
Br1 C10 C11 C12 . . . . -179.5(3) no
O1 C3 C2 C1 . . . . 179.8(4) no
O1 C3 C5 O2 . . . . -0.1(5) no
O1 C3 C5 C6 . . . . -179.7(4) no
O1 C4 O2 C5 . . . . 1.0(5) no
O2 C4 O1 C3 . . . . -1.1(5) no
O2 C5 C3 C2 . . . . -180.0(4) no
O2 C5 C6 C7 . . . . -178.8(4) no
O3 C8 N1 C9 . . . . 0.3(4) no
O3 C8 C7 C1 . . . . 36.6(5) no
O3 C8 C7 C6 . . . . -145.8(3) no
O3 C14 C9 N1 . . . . 0.6(4) no
O3 C14 C9 C10 . . . . -179.8(3) no
O3 C14 C13 C12 . . . . 179.9(4) no
O4 C12 C11 C10 . . . . 179.7(4) no
O4 C12 C13 C14 . . . . 179.7(4) no
N1 C8 O3 C14 . . . . 0.1(4) no
N1 C8 C7 C1 . . . . -145.9(4) no
N1 C8 C7 C6 . . . . 31.7(6) no
N1 C9 C10 C11 . . . . 179.6(4) no
N1 C9 C14 C13 . . . . 179.6(3) no
C1 C1 C2 C3 . 5_655 5_655 5_655 179.2(4) no
C1 C1 C7 C6 . 5_655 5_655 5_655 -178.0(4) no
C1 C1 C7 C8 . 5_655 5_655 5_655 -0.5(7) no
C1 C2 C3 C5 . . . . -0.3(6) no
C1 C7 C6 C5 . . . . -2.1(6) no
C2 C1 C1 C2 . . 5_655 5_655 63.3(7) no
C2 C1 C1 C7 . . 5_655 5_655 -116.5(3) no
C2 C1 C7 C6 . . . . 2.2(6) no
C2 C1 C7 C8 . . . . 179.7(4) no
C2 C3 O1 C4 . . . . -179.4(4) no
C2 C3 C5 C6 . . . . 0.4(6) no
C3 C2 C1 C7 . . . . -1.0(6) no
C3 C5 O2 C4 . . . . -0.6(5) no
C3 C5 C6 C7 . . . . 0.8(6) no
C4 O1 C3 C5 . . . . 0.7(5) no
C4 O2 C5 C6 . . . . 179.0(4) no
C5 C6 C7 C8 . . . . -179.8(3) no
C7 C1 C1 C7 . . 5_655 5_655 63.8(8) no
C7 C8 O3 C14 . . . . 177.9(3) no
C7 C8 N1 C9 . . . . -177.3(3) no
C8 O3 C14 C9 . . . . -0.4(4) no
C8 O3 C14 C13 . . . . -179.4(3) no
C8 N1 C9 C10 . . . . 179.9(4) no
C8 N1 C9 C14 . . . . -0.5(4) no
C9 C10 C11 C12 . . . . 0.2(6) no
C9 C14 C13 C12 . . . . 1.2(5) no
C10 C9 C14 C13 . . . . -0.8(5) no
C10 C11 C12 C13 . . . . 0.2(7) no
C11 C10 C9 C14 . . . . 0.1(5) no
C11 C12 O4 C15 . . . . 176.8(4) no
C11 C12 C13 C14 . . . . -0.9(6) no
C13 C12 O4 C15 . . . . -3.7(6) no
#------------------------------------------------------------------------------

_iucr_refine_instruction_details_constraints 
;
#
# Punched on 13/01/12 at 14:51:28
#
#LIST     12                                                                    
BLOCK SCALE X'S, U'S 
RIDE C   (   2,X'S) H   (  21,X'S) 
RIDE C   (   4,X'S) H   (  41,X'S) H   (  42,X'S) 
RIDE C   (   6,X'S) H   (  61,X'S) 
RIDE C   (  11,X'S) H   ( 111,X'S) 
RIDE C   (  13,X'S) H   ( 131,X'S) 
RIDE C   (  15,X'S) H   ( 151,X'S) H   ( 152,X'S) H   ( 153,X'S) 
END                                                                             
;


_iucr_refine_instruction_details_restraints 
;
#
# Punched on 13/01/12 at 14:51:28
#
#LIST     16                                                                    
NO 
REM   HREST   START (DO NOT REMOVE THIS LINE) 
REM   HREST   END (DO NOT REMOVE THIS LINE) 
END                                                                             
;


#===END
